# Supplementary material for: Novel Genetic Locus Implicated for HIV-1 Acquisition with Putative Regulatory Links to HIV Replication and Infectivity: A Genome-Wide Association Study
Source: PLoS One. 2015 Mar 18;10(3):e0118149. doi: 10.1371/journal.pone.0118149 (PMC4364715; doi:10.1371/journal.pone.0118149)
Supplement: S4 Table — Risk haplotype is used as the reference haplotype to match the protective effect for the tested allele for the replication SNP rs4878712. (XLSX) [file pone.0118149.s005.xlsx]

## Sheet: Sheet1
rs4878712-rs1329568 haplotype	Urban Health Study (UHS)													Women’s Interagency HIV Study (WIHS)													UHS and WIHS African Americans, Meta-analysis P	UHS and WIHS European Americans, Meta-analysis P	Overall UHS and WIHS, Meta-analysis P
	African Americans (N=2,004)						European Americans (N=1,132)						Meta-analysis P	African Americans (N=1,852)						European Americans (N=681)						Meta-analysis P
	Haplotype N (%)			OR	Lower CI	Upper CI	Haplotype N (%)			OR	Lower CI	Upper CI		Haplotype N (%)			OR	Lower CI	Upper CI	Haplotype N (%)			OR	Lower CI	Upper CI
A-T (referent)	659 (16.4)			-	-	-	16 (0.7)			-	-	-	-	588 (15.9)			-	-	-	17 (1.2)			-	-	-	-	-	-	-
A-G	2101 (52.4)			0.753	0.626	0.904	991 (43.8)			0.314	0.115	0.857	0.000154178	1962 (53.0)			0.989	0.776	1.26	619 (45.4)			0.712	0.168	3.015	0.750771	0.0244074	0.0384398	0.00247081
G-T	189 (4.7)			0.597	0.417	0.855	10 (0.4)			1.634	0.303	8.807	0.0567078	176 (4.8)			0.729	0.474	1.122	13 (1.0%)			0.612	0.079	4.736	0.141102	0.00250126	0.870344	0.016349
G-G	1059 (26.4)			0.612	0.496	0.755	1247 (55.1)			0.293	0.108	0.8	3.34332e-07	978 (26.4)			0.721	0.553	0.941	713 (52.3)			0.571	0.134	2.432	0.0140995	6.53504e-07	0.0183778	5.44121e-08
Protective alleles are shown in red.
