# Supplementary material for: Novel Genetic Locus Implicated for HIV-1 Acquisition with Putative Regulatory Links to HIV Replication and Infectivity: A Genome-Wide Association Study
Source: PLOS journal article supplement (doi:10.1371/journal.pone.0118149), 2015-03-18

**Figure S5. Quantile-quantile plot showing the meta-analysis results of approximately 8 million SNPs and indels tested for association with HIV-1 acquisition in 2,004 African Americans and 1,132 European Americans from the Urban Health Study.** The observed distribution of meta-analysis  $P$  values vs. the expected distribution of  $P$  values (black dots) is plotted on a logarithmic scale along with the identity line (red), which represents identical observed and expected distributions. The corresponding genomic inflation factor ( $\lambda_{gc}$ ) is shown.

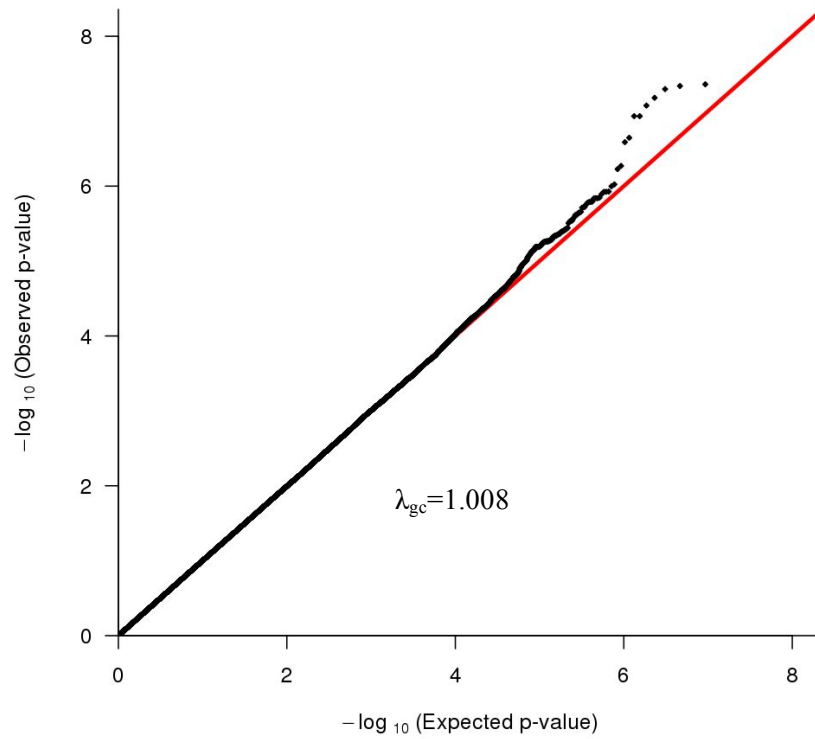

Supplement: S10 (10.1371/journal.pone.0118149.s010) [file journal.pone.0118149.s010]
